# Supplementary material
Source: publisher figshare collection journal article supplement (https://acs.figshare.com/ndownloader/files/17955209)
Supplement: Supplementary file 1 [file 17955209]

## Supporting Information

### **Tuning upconversion efficiency and spectrum of upconversion nanoparticles through surface decorating of organic dye**

Meng Xue<sup>a</sup>, Cong Cao<sup>a,b</sup>, Xiaobo Zhou<sup>a</sup>, Ming Xu<sup>a</sup>, Wei Feng<sup>a\*</sup>, Fuyou Li<sup>a\*</sup>

<sup>a</sup>Department of Chemistry & State Key Laboratory of Molecular Engineering of Polymers & Institute of Biomedicine Sciences & Collaborative Innovation Center of Chemistry for Energy Materials, Fudan University, 220 Handan Road, Shanghai 200433, P.R. China.

<sup>b</sup>Department of Materials Engineering, College of Materials and Textile, Zhejiang Sci-Tech University, Hangzhou 310018, P.R. China

E-mail: fengweifd@fudan.edu.cn and fyli@fudan.edu.cn

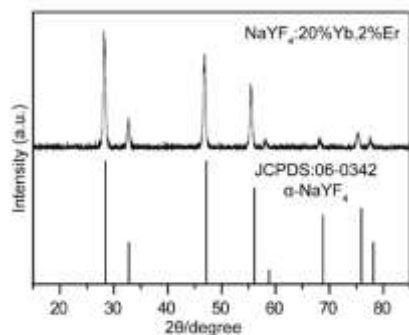

**Figure S1:** X-ray diffraction (XRD) pattern of NaYF<sub>4</sub>:20%Yb,2%Er nanoparticles and the standard of cubic phase NaYF<sub>4</sub> (JCPDS card No. 06-0342).

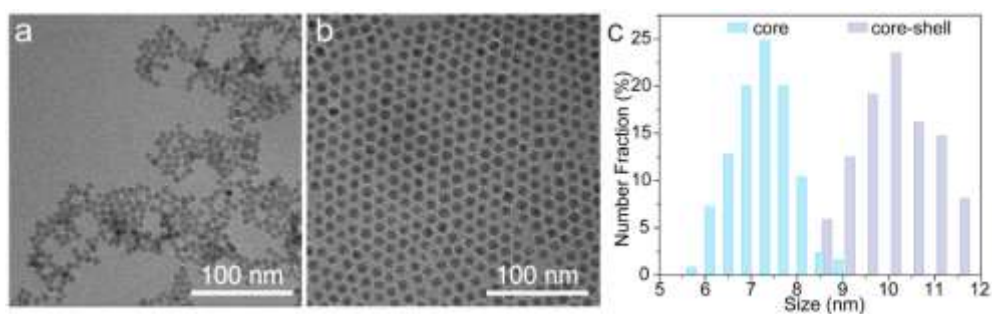

**Figure S2:** (a) Low-resolution TEM image of NaYF<sub>4</sub>:20%Yb,2%Er NPs. (b) Low-resolution TEM image of NaYF<sub>4</sub>:20%Yb,2%Er@CaF<sub>2</sub>(1:2) NPs. (c) Particle size distribution of core NaYF<sub>4</sub>:20%Yb,2%Er NPs and core-shell NaYF<sub>4</sub>:20%Yb,2%Er@CaF<sub>2</sub>(1:2) NPs. These data were obtained from the TEM images with more than 100 nanoparticles.

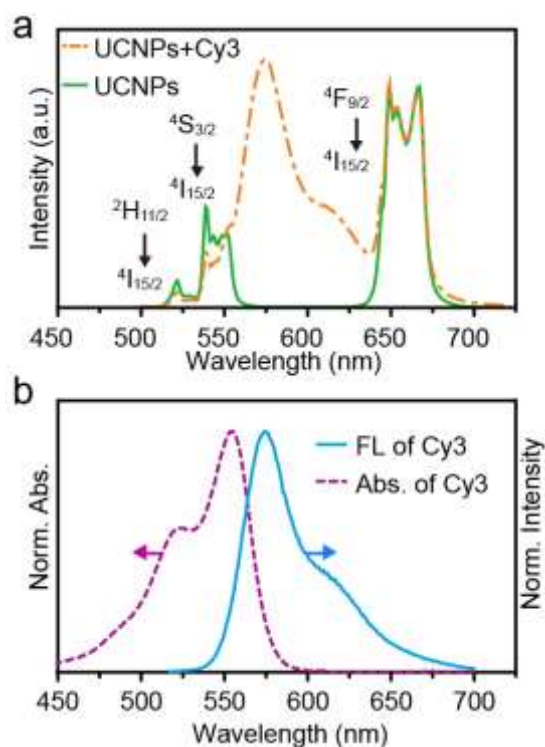

**Figure S3:** (a) Upconversion luminescence spectrum of NaYF<sub>4</sub>:20%Yb,2%Er@CaF<sub>2</sub>(1:2) with (orange dash line) and without (green solid line) Cy3-SO<sub>3</sub> in DMSO excited by a 980 nm laser. (b) Fluorescence (blue solid line, Ex: 488 nm) and absorption (purple dash line) spectrum of Cy3-SO<sub>3</sub> in DMSO.

We measured the upconversion luminescence spectrum of NaYF<sub>4</sub>:20%Yb,2%Er@CaF<sub>2</sub>(1:2) NPs with Cy3-SO<sub>3</sub> with different power density (Figure S4a) and converted the luminescence spectrum into CIE 1931 color coordinates (Table S1). The luminescence color changed with different pump power density.

**Table S1:** The luminescence color coordinates of NaYF<sub>4</sub>:20%Yb,2%Er@CaF<sub>2</sub>(1:2) NPs with different pump power density of the 980 nm laser.

|                      | CIE x  | CIE y  |
|----------------------|--------|--------|
| 5 W/cm <sup>2</sup>  | 0.5513 | 0.447  |
| 10 W/cm <sup>2</sup> | 0.5514 | 0.447  |
| 15 W/cm <sup>2</sup> | 0.5505 | 0.4478 |
| 20 W/cm <sup>2</sup> | 0.5503 | 0.448  |
| 25 W/cm <sup>2</sup> | 0.5491 | 0.4491 |
| 30 W/cm <sup>2</sup> | 0.5487 | 0.4495 |
| 35 W/cm <sup>2</sup> | 0.5481 | 0.4502 |

The dependence of the visible fluorescence intensity on the pump-laser power was calculated as shown in Figure S4b. In principle, the UCL emission intensity,  $I_{em}$ , is proportional to the power  $n$  of the near-infrared (NIR) exciting pump power. We found

that the  $n$  value of 539 and 575 nm is larger than that of 650 nm, which means the change tendency of emission intensity at 539, 575 and 650 nm with the exciting pump power are different. Because Cy3-SO<sub>3</sub> received energy from Er<sup>3+</sup> ions (<sup>2</sup>H<sub>11/2</sub> and <sup>4</sup>S<sub>3/2</sub>), the change tendency of emission at 575 nm (Cy3-SO<sub>3</sub>) is the same with 539 nm (Er<sup>3+</sup> ions). And the emission intensity at 539 nm increased more than 650 nm. So the color of the UCNPs-Cy3-SO<sub>3</sub> system will changed with the power density.

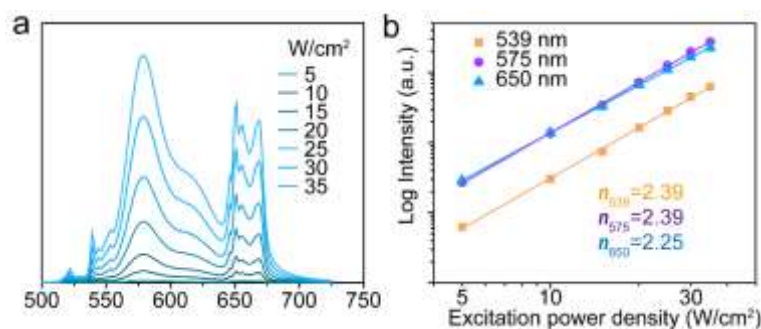

**Figure S4:** (a) Upconversion luminescence spectrum of 6.67 mM NaYF<sub>4</sub>:20%Yb,2%Er@CaF<sub>2</sub>(1:2) NPs with 5.33 μM Cy3-SO<sub>3</sub> in DMSO excited with different power density. (b) Log-log plots of luminescence emission of NaYF<sub>4</sub>:20%Yb,2%Er@CaF<sub>2</sub>(1:2) as a function of pump power of the 980 nm laser.

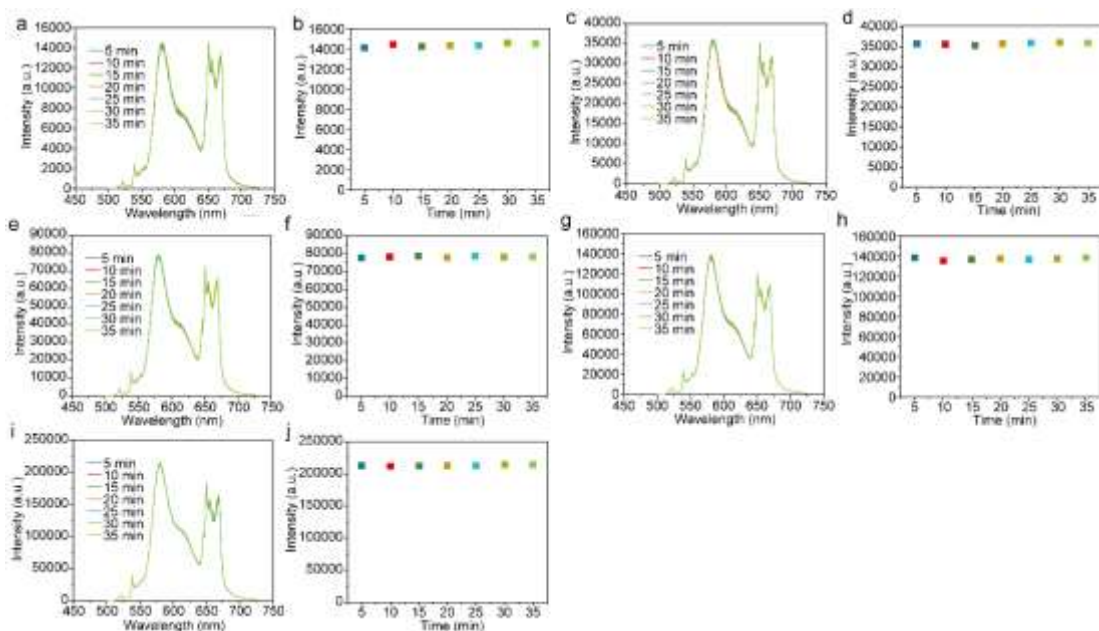

**Figure S5:** Changes in fluorescence spectra with 5.33 μM Cy3-SO<sub>3</sub> in 6.67 mM UCNPs DMSO solution and the fluorescence intensity of Cy3-SO<sub>3</sub> at 580 nm as a function of time with power density 10 W/cm<sup>2</sup> (a, b), 15 W/cm<sup>2</sup> (c, d), 20 W/cm<sup>2</sup> (e, f), 25 W/cm<sup>2</sup> (g, h), and 30 W/cm<sup>2</sup> (i, j), respectively. (Ex: 980 nm)

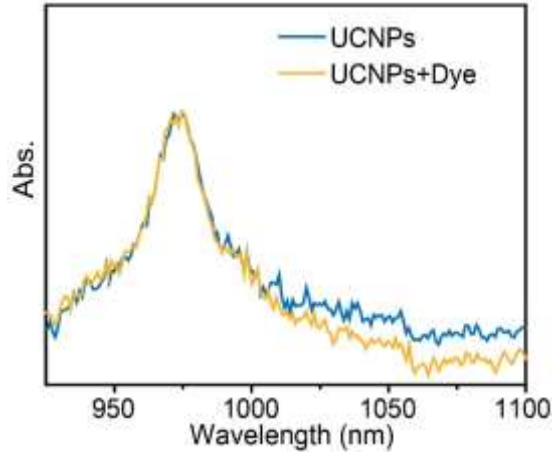

**Figure S6:** The absorption spectrum of  $\text{NaYF}_4:20\%\text{Yb},2\%\text{Er}@\text{CaF}_2(1:2)$  with (orange) and without (blue)  $\text{Cy3-SO}_3$  dye.

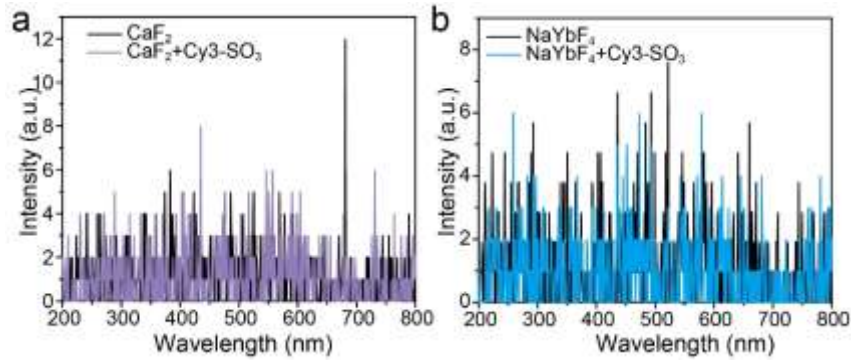

**Figure S7:** Upconversion luminescence spectrum of  $\text{NaYbF}_4$  and  $\text{CaF}_2$  with and without  $\text{Cy3-SO}_3$  in DMSO excited by a 980 nm CW laser. The experiment condition was the same with the experiment condition in Figure 2.

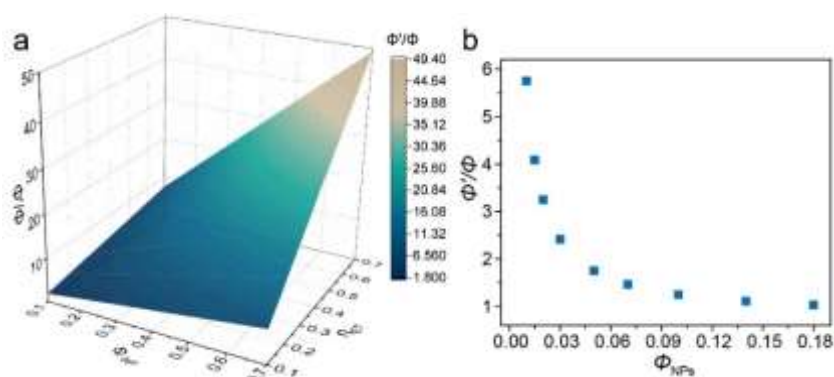

**Figure S8:** (a) The relationship of  $\phi_{\text{dye}}$  and  $\eta_{\text{ET}}$  with  $\phi'/\phi$ .  $\phi_{\text{NPs}}$  was assumed as 1%. (b) The relationship of  $\phi_{\text{UCNPs}}$  with  $\phi'/\phi$ .  $\phi_{\text{dye}}$  and  $\eta_{\text{ET}}$  were assumed as 20% and 25%, respectively.

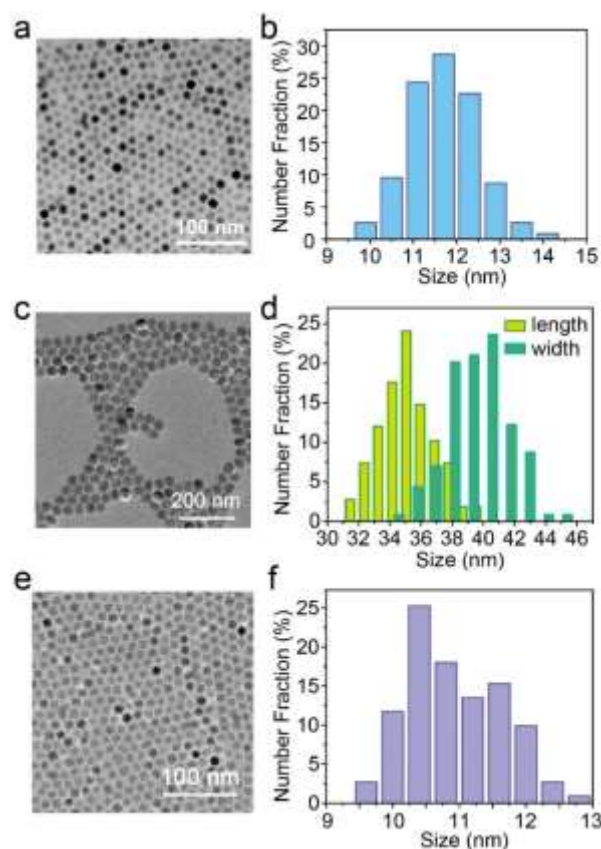

**Figure S9:** (a) Low-resolution TEM image of NaYF<sub>4</sub>:20%Yb,2%Er@CaF<sub>2</sub>(1:4) NPs. (b) Particle size distribution of NaYF<sub>4</sub>:20%Yb,2%Er@CaF<sub>2</sub>(1:4) NPs. (c) Low-resolution TEM image of NaYF<sub>4</sub>:20%Yb,2%Er NPs. (d) Particle size distribution of NaYF<sub>4</sub>:20%Yb,2%Er NPs. (e) Low-resolution TEM image of NaYbF<sub>4</sub>:30%Tb@CaF<sub>2</sub>:20%Tb NPs. (f) Particle size distribution of NaYbF<sub>4</sub>:30%Tb@CaF<sub>2</sub>:20%Tb NPs. These data were obtained from the TEM images with more than 100 nanoparticles.

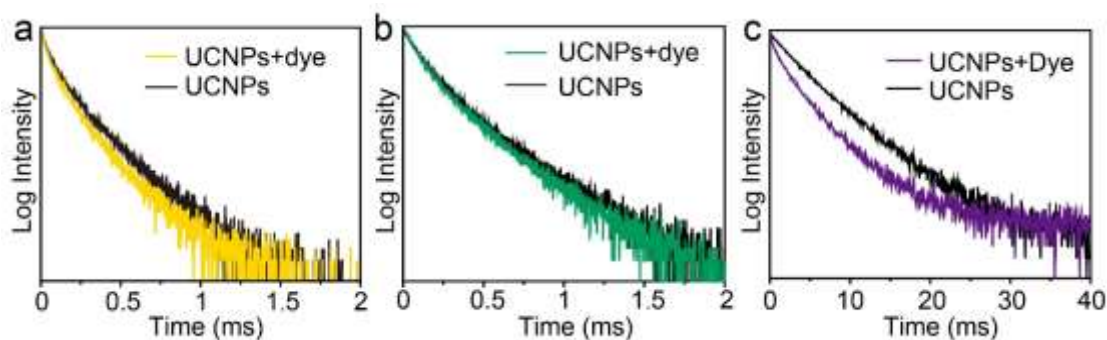

**Figure S10:** (a) Decay curves of  $\text{Er}^{3+}$  ions emission at 540 nm from  $\text{NaYF}_4\text{:}20\%\text{Yb},2\%\text{Er@CaF}_2(1:4)$  NPs with and without  $\text{Cy3-SO}_3$  in DMSO excited by a 488 nm pulse laser. (b) Decay curves of  $\text{Er}^{3+}$  ions emission at 540 nm from  $\text{NaYF}_4\text{:}20\%\text{Yb},2\%\text{Er}$  with and without  $\text{Cy3-SO}_3$  in DMSO excited by a 488 nm pulse laser. (c) Decay curves of  $\text{Tb}^{3+}$  ions emission at 541 nm from  $\text{NaYbF}_4\text{:}30\%\text{Tb@CaF}_2\text{:}20\%\text{Tb}(1:2)$  NPs with and without  $\text{Cy3-SO}_3$  in DMSO excited by a 488 nm pulse laser.

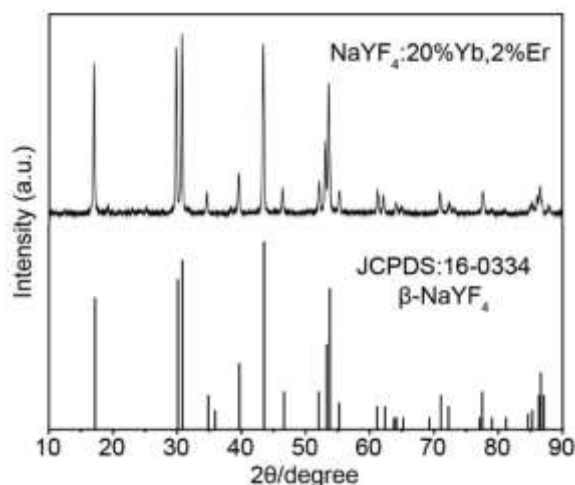

**Figure S11:** (a) X-ray diffraction (XRD) pattern of hexagonal  $\text{NaYF}_4\text{:}20\%\text{Yb},2\%\text{Er}$  nanoparticles and the standard of hexagonal phase  $\text{NaYF}_4$  (JCPDS card No. 16-0334).

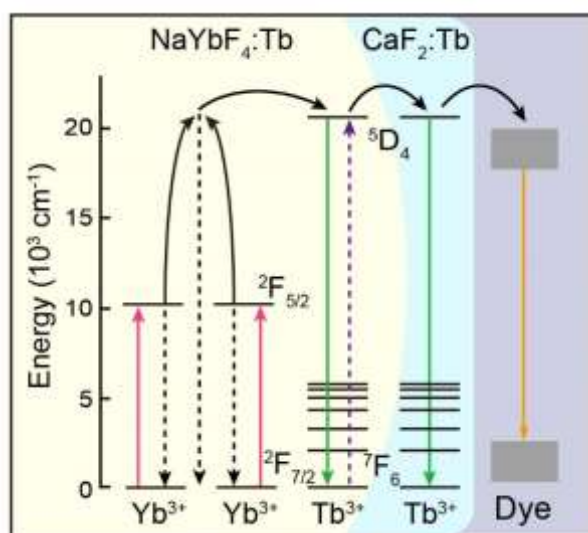

**Figure S12:** Part of energy level diagram of  $\text{Yb}^{3+}$  and  $\text{Tb}^{3+}$  doped  $\text{NaYbF}_4$ .

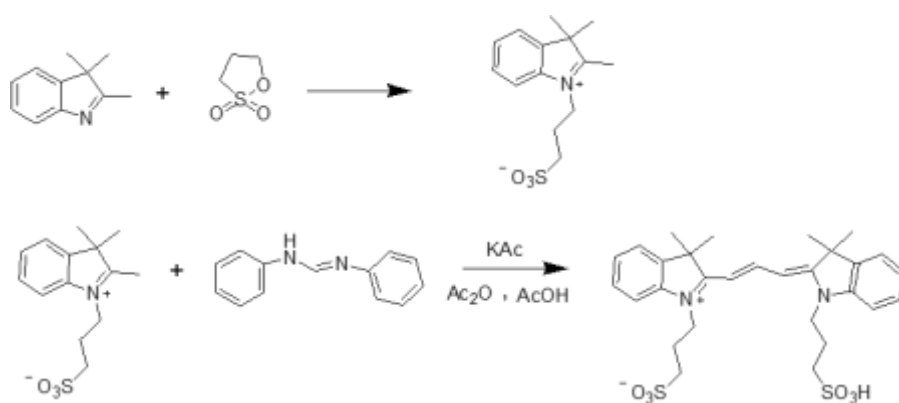

**Scheme S1.** Synthetic route of Cy3-SO<sub>3</sub>.



### Calculation of the number of Cy3-SO<sub>3</sub> dye on per nanoparticle

We mixed UCNPs (6.67 mM, 1500  $\mu$ L) with 0  $\mu$ L, 1  $\mu$ L, 2  $\mu$ L, 3  $\mu$ L, 4  $\mu$ L, 5  $\mu$ L, 6  $\mu$ L, 7  $\mu$ L, 8  $\mu$ L and 9  $\mu$ L Cy3-SO<sub>3</sub> dye ( $10^{-3}$  M), respectively. Then the nanoparticles were centrifuged at 16500 rpm for 40 min. Take out the supernatant and measure the absorption spectra of supernatant. As shown in Figure S13, after centrifugation, there was no absorption peak of Cy3-SO<sub>3</sub> in the supernatant, indicating that no free dye exists in the supernatant, and all the dripped Cy3-SO<sub>3</sub> has attached to the UCNPs surface.

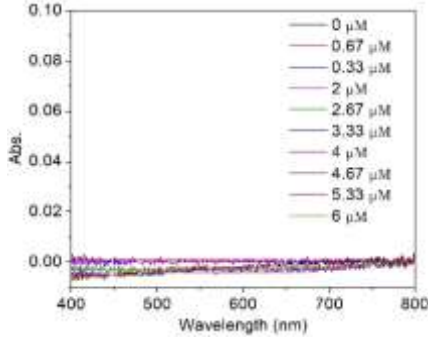

**Figure S13:** After centrifugation, changes in absorption spectra of supernatant with different addition of Cy3-SO<sub>3</sub> in UCNPs solution.

We consider the volume of NaYF<sub>4</sub> and NaYF<sub>4</sub>:Yb,Er are approximately equal due to the low doping concentration of Yb<sup>3+</sup> and Er<sup>3+</sup> ions. The volume of NaYF<sub>4</sub> unit cell can be described as

$$V_{\text{unit cell}} = a^3 = 0.16 \text{ nm}^3$$

The volume of NaYF<sub>4</sub>:Yb,Er is

$$V_{\text{NP}} = \frac{4}{3} \pi r^3 = 187.40 \text{ nm}^3$$

So one NaYF<sub>4</sub>:Yb,Er nanoparticle has about 1171 unit cells. A unit cell contains 2 rare earth atoms. So one NaYF<sub>4</sub>:Yb,Er nanoparticle has about 2342 rare earth atoms. Take 1500  $\mu$ L UCNPs (6.67 mM) with 1  $\mu$ L Cy3-SO<sub>3</sub> dye ( $10^{-3}$  M) in DMSO as example. 0.01 mmol UCNPs has 0.01 mmol rare earth ions which construct about  $2.57 \times 10^{15}$  nanoparticles. 1  $\mu$ L Cy3-SO<sub>3</sub> ( $10^{-3}$  M) dye solution has  $6.02 \times 10^{14}$  dye molecule. So there is 0.23 dye attach on a nanoparticle. According to the concentration of UCNPs and Cy3-SO<sub>3</sub>, we calculated the number of Cy3-SO<sub>3</sub> attached on per UCNPs shown in **Table S2**.

**Table S2:** The relationship between Cy3-SO<sub>3</sub> concentration and the number of Cy3-SO<sub>3</sub> on per UCNPs.

|                                |      |      |      |      |      |      |      |      |      |      |
|--------------------------------|------|------|------|------|------|------|------|------|------|------|
| $N_{\text{dye}}$               | 0    | 0.23 | 0.46 | 0.69 | 0.92 | 1.15 | 1.38 | 1.61 | 1.84 | 2.07 |
| $c_{\text{dye}} (\mu\text{M})$ | 0.00 | 0.67 | 1.33 | 2.00 | 2.67 | 3.33 | 4.00 | 4.67 | 5.33 | 6.00 |
